# Supplementary material for: High-throughput lipidomics reveal mirabilite regulating lipid metabolism as anticancer therapeutics
Source: PubMed Central journal article supplement — RSC Adv. 2018 Oct 18;8(62):35600–10. doi: 10.1039/c8ra06190d (PMC9087915; doi:10.1039/c8ra06190d), 2018-10-18
Supplement: RA-008-C8RA06190D-s001.pdf [file RA-008-C8RA06190D-s001.pdf]

Table S1 Information of potential lipid biomarkers of serum samples in APC<sup>min/+</sup> model

| Compound ID  | Compound              | t <sub>R</sub> | m/z     | CON                   | MOD                        | Mirabilite                 |
|--------------|-----------------------|----------------|---------|-----------------------|----------------------------|----------------------------|
| LMFA03060001 | 15(S)-HETE            | 7.03           | 319.228 | 7456423.80±1161624.96 | 9692761.4±01485045.52*     | 13184067.6±7274385.81##    |
| LMFA01050455 | 2-Hydroxybutyric acid | 1.49           | 103.04  | 34815.14±6908.52      | 57588.84±12965.67**        | 23034.73±18463.94##        |
| LMST01030127 | 6-Deoxocastasterone   | 11.0<br>6      | 449.36  | 47312.56±28058.78     | 9074.97±7130.31*           | 17370.80±8382.51           |
| LMPR01090036 | 9-cis retro-γ-retinal | 7.03           | 285.221 | 377703.98±51049.37    | 496073.02±75288.82*        | 318297.60±392446.36##      |
| LMSP02050012 | CerP(d18:1/8:0)       | 8.59           | 506.36  | 247245.82±96590.73    | 475756.46±73994.74**       | 665285.26±34345.68##       |
| LMP012409    | Hypoxanthine          | 1.13           | 137.046 | 237277.44±169969.79   | 54983.30±32049.16*         | 71498.66±129807.70         |
| LMFA07070050 | L-Acetylcarnitine     | 0.84           | 204.123 | 1327409.80±133772.12  | 1917996.40±213318.15**     | 1252613.92±511906.67#      |
| LMFA01030120 | Linoleic acid         | 11             | 279.234 | 1746.51±758.23        | 819.93868±302.07*          | 1704.13924±1290.89         |
| LMGP01050076 | PC(0:0/18:0)          | 9.13           | 524.373 | 132528224±40986604.98 | 211109300±25782316.84**    | 229206475±9104743.24       |
| LMGP01050121 | PC(0:0/20:4)          | 7.33           | 544.338 | 2803617.80±947215.50  | 4002222.40±296092.63*      | 3961052.76±220672.05#      |
| LMGP01050022 | PC(16:1)              | 5.93           | 494.325 | 8810133.40±2502729.69 | 13126183.33±189186.68*     | 19817816±1109790.16##      |
| LMGP01050026 | PC(18:0/0:0)          | 9.13           | 524.373 | 132528224±40986604.99 | 225798143.51±19067716.54** | 229206466.29±9104728.92    |
| LMGP01050032 | PC(18:1)              | 7.34           | 522.356 | 73398318±26983633.69  | 105965418±9536838.33*      | 103352427.43±10632854.05## |
| LMGP01050128 | PC(18:3)              | 5.8            | 518.324 | 2153124.20±476753.08  | 2726491.80±265249.78*      | 2467117.33±164195.15       |
| LMGP01050040 | PC(18:4)              | 5.93           | 516.305 | 280823.24±94306.53    | 430853.92±49376.56*        | 723970.98±44943.83##       |
| LMGP01050133 | PC(20:3)              | 8.59           | 546.353 | 1017836.98±401249.00  | 1876566.40±303286.44**     | 1791347.25±832316.47##     |
| LMGP01050050 | PC(20:5)              | 7.02           | 542.327 | 4080.97±1600.65       | 6877.58±1405.04*           | 6564.88±748.379#           |

|              |                 |      |         |                         |                          |                             |
|--------------|-----------------|------|---------|-------------------------|--------------------------|-----------------------------|
| LMGP01080029 | PC(7:0/O-8:0)   | 6.2  | 482.324 | 1364288.66±421351.734   | 2142809.50±251625.83*    | 2172928.50±464276.79##      |
| LMGP01020004 | PC(O-1:0/16:0)  | 7.89 | 510.356 | 3096038.20±1118112.98   | 5106387.60±505094.47**   | 7874841.20±497498.07##      |
| LMGP01020028 | PC(O-16:0/1:0)  | 7.47 | 510.355 | 594946.16±183986.35.    | 928482.60±75309.47**     | 1051229.36±50086.81##       |
| LMGP01030009 | PC(P-16:0/2:0)  | 7.34 | 522.356 | 73398320.16±26983634.99 | 105965428.87±9536854.48* | 134756852.74±12133289.84##  |
| LMGP02050001 | PE(18:0/0:0)    | 5.97 | 482.324 | 186034.46±59927.34      | 266602.52±48481.70*      | 180262.43±62216.92##        |
| LMGP02050012 | PE(20:0/0:0)    | 7.24 | 510.355 | 123302.74±51469.09.     | 185932.14±28429.41*      | 160907.453682961±64168.86## |
| LMGP02050026 | PE(21:0/0:0)    | 8.3  | 524.37  | 137107.94±49814.37      | 216182.54±30099.65*      | 142008.565791274±45977.29## |
| LMPR01090012 | Retinyl acetate | 7.21 | 329.247 | 3635708.80±479274.99.   | 60216.44±10941.13*       | 58428.09±9776.44##          |

“\*”: CON vs MOD, p<0.05; “\*\*”: CON vs MOD, p<0.01; “#”: Mirabilite vs MOD, p<0.05; “##”: Mirabilite vs MOD, p<0.01.

Table S2 Disordered pathways in serum samples of APC<sup>min/+</sup> mice from control, model and mirabilite-treated group

| Pathway                                 | Total | Expected | Hits | Raw p    | Holm adjust | FDR | Impact  |
|-----------------------------------------|-------|----------|------|----------|-------------|-----|---------|
| Linoleic acid metabolism                | 6     | 0.02964  | 1    | 0.029328 | 1           | 1   | 1       |
| Retinol metabolism                      | 16    | 0.07904  | 1    | 0.076569 | 1           | 1   | 0.24551 |
| Propanoate metabolism                   | 20    | 0.0988   | 1    | 0.094906 | 1           | 1   | 0       |
| Arachidonic acid metabolism             | 36    | 0.17784  | 1    | 0.16517  | 1           | 1   | 0       |
| Biosynthesis of unsaturated fatty acids | 42    | 0.20748  | 1    | 0.19028  | 1           | 1   | 0       |
| Purine metabolism                       | 68    | 0.33592  | 1    | 0.29178  | 1           | 1   | 0.01064 |
